# Supplementary material
Source: publisher site journal article supplement (https://www.dovepress.com/article/330637)
Supplement: Supplementary file 1 [file get_supplementary_file.php]

## Supplementary figures

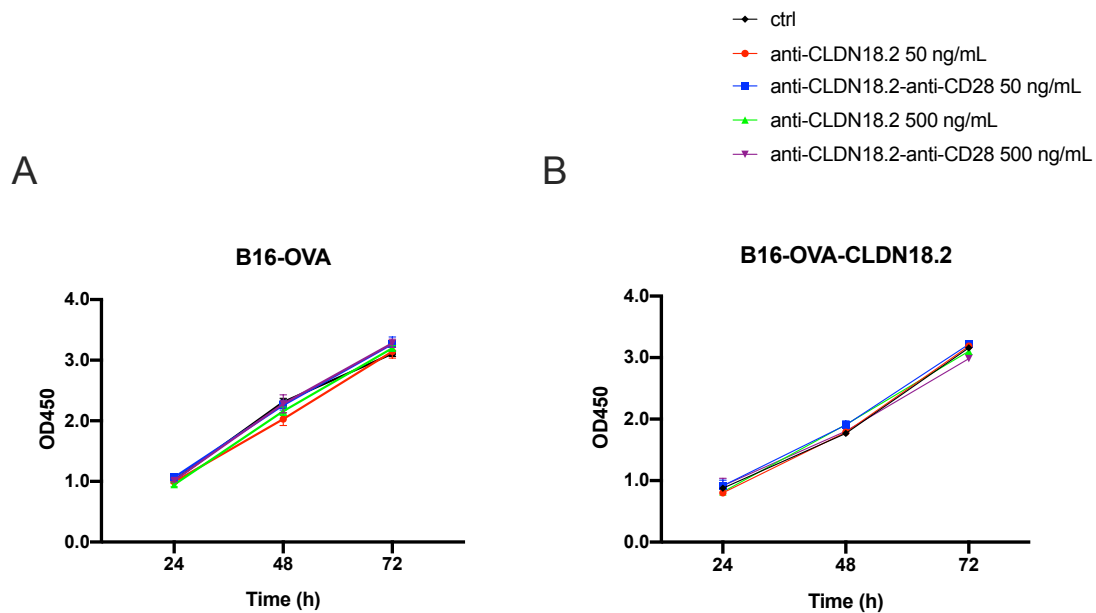

**Supplementary figure 1 Anti-CLDN18.2 and anti-CLDN18.2-anti-CD28 have no influence on tumor growth.**  $5 \times 10^3$  B16-OVA (A) or B16-OVA-CLDN18.2 tumor cells (B) were seeded in 96-well plates in the absence or presence of different concentrations of anti-CLDN18.2 or anti-CLDN18.2-anti-CD28. The cell proliferation was measured by CCK-8 reagent at indicated time points. Data was shown as the mean  $\pm$  SEM ( $n = 3$ ).
